# Supplementary material for: Photoresponsivity of an all-semimetal heterostructure based on graphene and WTe2
Source: PubMed Central journal article supplement (PMC6110789; doi:10.1038/s41598-018-29717-8), 2018-08-27
Supplement: 41598_2018_29717_MOESM1_ESM.pdf [file 41598_2018_29717_MOESM1_ESM.pdf]

**SUPPLEMENTARY INFORMATION**

**Photoresponsivity of an all-semimetal heterostructure based  
on graphene and WTe<sub>2</sub>**

Yujie Liu<sup>1,3</sup>, Chuan Liu<sup>1,3</sup>, Xiaomu Wang<sup>1,3</sup>, Liang He<sup>1,3</sup>, Xiangang Wan<sup>2,3</sup>, Yongbing  
Xu<sup>1,3</sup>, Yi Shi<sup>1,3</sup>, Rong Zhang<sup>1,3</sup>, Fengqiu Wang<sup>1,3\*</sup>

<sup>1</sup> School of Electronic Science and Engineering, Nanjing University, Nanjing 210093, China.

<sup>2</sup> School of Physics, Nanjing University, Nanjing 210093, China.

<sup>3</sup> Collaborative Innovation Center of Advanced Microstructures, Nanjing University, Nanjing  
210093, China.

E-mail: [fwang@nju.edu.cn](mailto:fwang@nju.edu.cn)

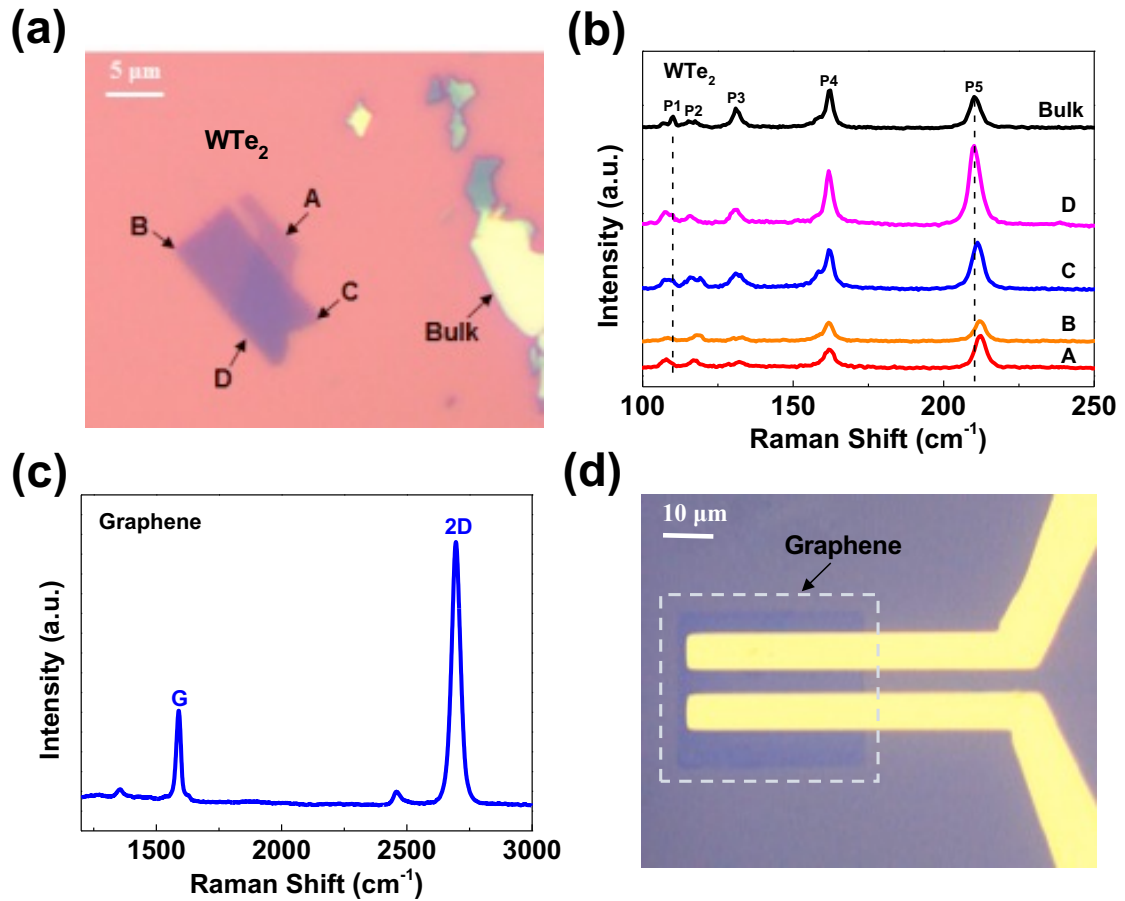

**Figure S1.** (a) Optical image of a  $\text{WTe}_2$  sample exfoliated on  $\text{SiO}_2/\text{Si}$  substrate. Optical contrast shows the thickness of  $\text{WTe}_2$  flakes is increase from position A to D. (b) Raman spectra of bulk and ultrathin  $\text{WTe}_2$  flakes in (a). Distinctive peaks, labelled as P1-P5, are clearly observed. As guided by the dotted lines, they follow a systematic shift with increasing the number of layers, the thicknesses of positon A-D are 2~8 monolayers of  $\text{WTe}_2$ , which is consistent to the previous report [1]. (c) Raman spectroscopic characterization of monolayer graphene. It shows a strong 2D peak and G peak, and the Raman intensity ratio of the 2D/G mode is  $>2$ , indicating the high quality of our monolayer graphene [2]. (d) Optical micrograph of a fabricated pure graphene device. Monolayer graphene as channel is represented in the dashed square. The channel area is the same with graphene/ $\text{WTe}_2$  heterostructure device in original text.

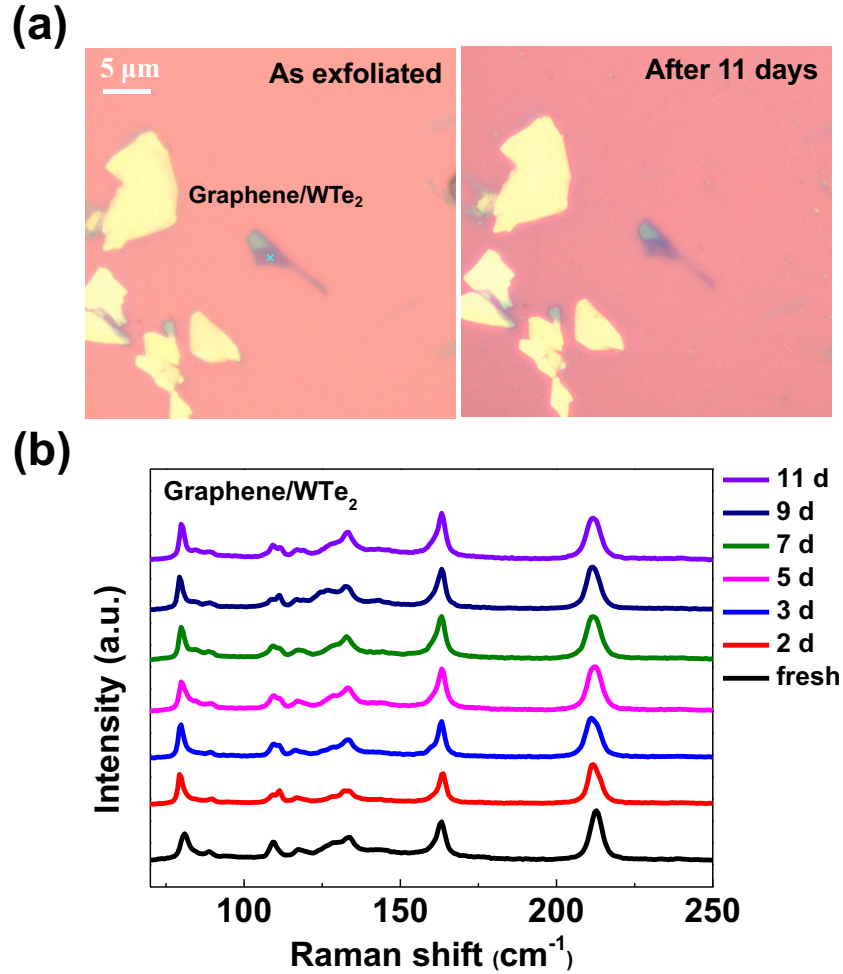

**Figure S2.** Optical microscope images and Raman spectroscopy results of graphene/WTe<sub>2</sub> hybrid film at sequential stages after its fresh deposition on the Si/SiO<sub>2</sub> substrate under ambient conditions. (a) Optical microscope images of fresh graphene/WTe<sub>2</sub> and exposed to air for 11 days. The thickness of WTe<sub>2</sub> flake beneath of graphene is 6 nm. (b) Raman spectrum of graphene/WTe<sub>2</sub> hybrid film in (a) during 11 days. Note that the Raman spectrum were recorded at the same region as marked “x” in (a).

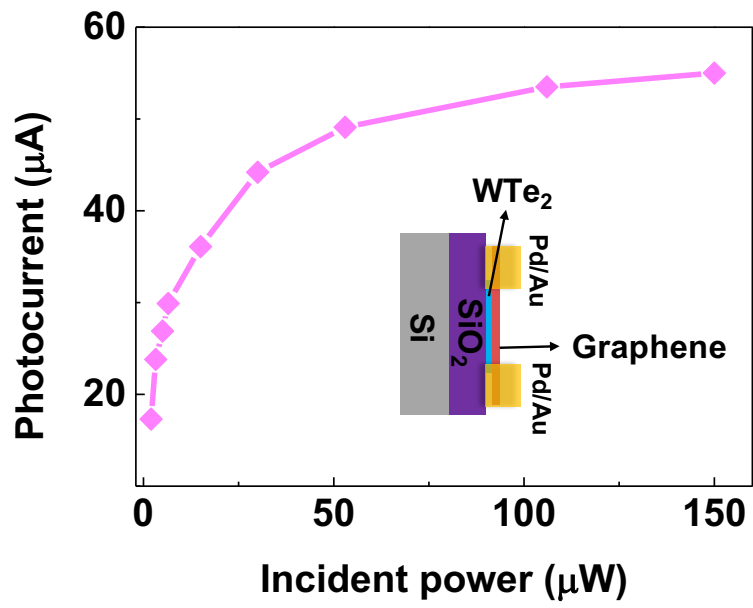

**Figure S3.** Photocurrent of the graphene/ $\text{WTe}_2$  heterostructure device as a function of the incident light power under 650 nm at  $V_{\text{DS}} = 1$  V. Inset: schematic of the hybrid device.

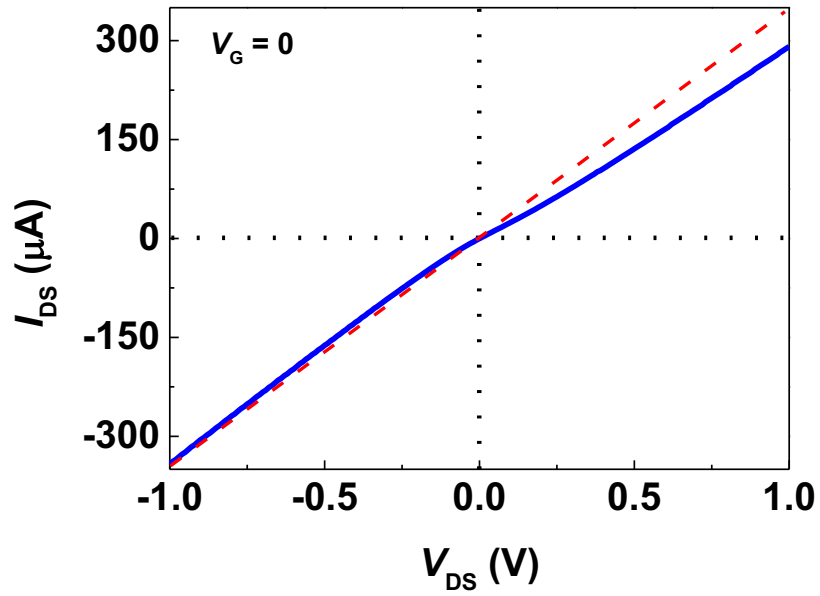

**Figure S4.** The current-bias voltage ( $I$ - $V$ ) characteristic of the staggered graphene/WTe<sub>2</sub> hybrid device in dark at  $V_G = 0$ .

1. Lee, J. *et al.* Single- and few-layer WTe<sub>2</sub> and their suspended nanostructures: Raman signatures and nanomechanical resonances. *Nanoscale* **8**, 7854-7860 (2016).
2. Fu, X. *et al.* Graphene/ZnO nanowire/graphene vertical structure based fast-response ultraviolet Photodetector. *Appl. Phys. Lett.* **100**, 223114 (2012).
